# Supplementary material
Source: PubMed Central journal article supplement (PMC8096941)
Supplement: 41421_2021_268_MOESM2_ESM.pdf [file 41421_2021_268_MOESM2_ESM.pdf]

**Fig. S2**

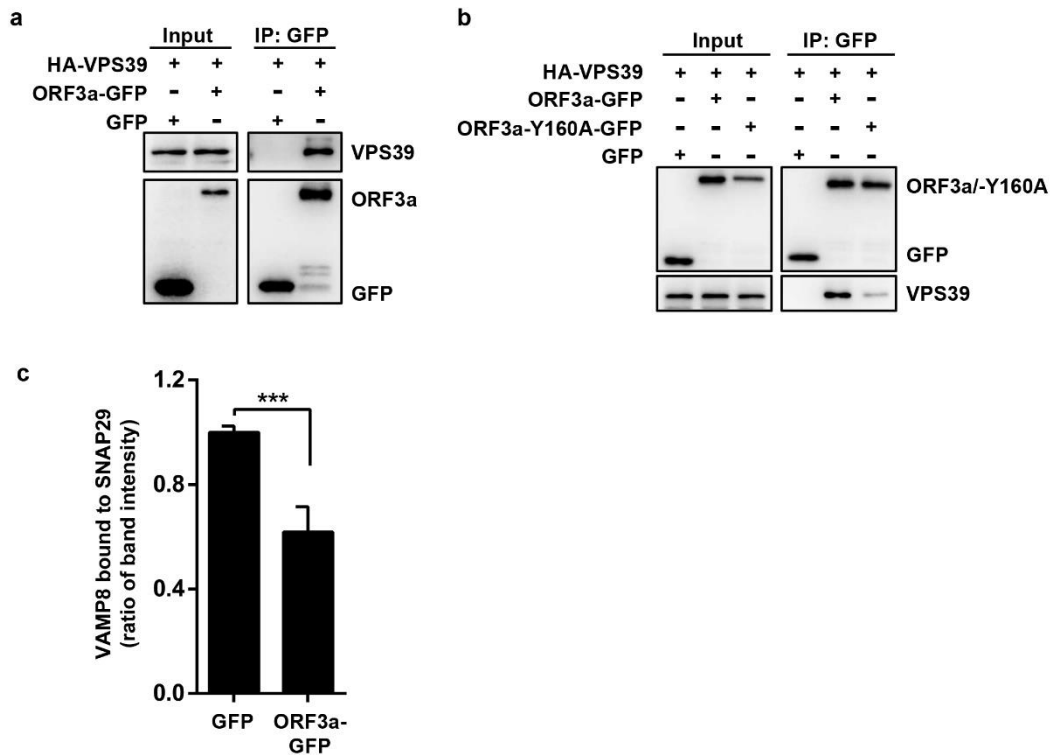

**Fig. S2 ORF3a interacted with HOPS component VPS39.**

**a.** ORF3a was found to interact with VPS39, as shown by the co-IP assays.

**b.** The Y160A mutation in ORF3a dramatically reduced the interaction between ORF3a and VPS39, as shown by coimmunoprecipitation assay.

**c.** Quantification of the amounts of VAMP8 bound by SNAP29 in the presence of GFP or ORF3a-GFP. The band intensity in the western blots (IP panels) of VAMP8 was compared to that of SNAP29 in Fig. 5j. The results from three completed experiments were analyzed.

\*\*\*: P<0.001.
